## Title: Why do some fungi want to be sterile? The role of dysfunctional Pro1 in the rice blast fungus

**Authors:** Momotaka Uchida<sup>1</sup>, Takahiro Konishi<sup>1</sup>, Ayaka Fujigasaki<sup>1</sup>, Kohtetsu Kita<sup>1</sup>, Tsutomu Arie<sup>2</sup>, Tohru Teraoka<sup>2</sup>, Takayuki Arazoe<sup>1</sup> and Takashi Kamakura<sup>1\*</sup>

### 5 Affiliations:

<sup>1</sup>Department of Applied Biological Science, Faculty of Science and Technology, Tokyo University of Science; 2641 Yamazaki, Noda, Chiba 278-8510, Japan.

<sup>2</sup>United Graduate School of Agricultural Science, Tokyo University of Agriculture and Technology (TUAT); 3-5-8 Saiwai-cho, Fuchu, Tokyo 183-0054, Japan.

10 \*Corresponding author. Email: [kamakura@rs.tus.ac.jp](mailto:kamakura@rs.tus.ac.jp)

### Abstract:

Although sexual reproduction is widespread in eukaryotes, some fungal species can only reproduce asexually. Therefore, loss of sexual reproduction may confer survival advantages under certain conditions in certain species. In the rice blast fungus *Pyricularia (Magnaporthe) oryzae*, several isolates from the region of origin retain mating ability (female fertility), but most isolates are female sterile. Therefore, it is hypothesized that female fertility was lost during its spread from the origin to the rest of the world, and *P. oryzae* is an ideal biological model for studying the cause of the evolutionary shift in the reproductive mode. Here, we show that functional mutations of Pro1, a global transcriptional regulator of mating-related genes in filamentous fungi, is one cause of loss of female fertility in this fungus. Employing backcrossing between female-fertile and female-sterile field isolates, we identified the putative genomic region involved in female sterility by comparative genomics between the genomes of F<sub>4</sub> female-fertile and -sterile progenies. Further genotyping, linkage, and functional analyses revealed that the functional mutation of Pro1 causes the loss of female fertility. RNA sequencing analysis showed that Pro1 regulates global gene expression, including that of several mating-related genes. The dysfunctional Pro1 did not affect the infection processes, such as conidial germination, appressorium formation, and penetration, but conidial release from conidiophores was increased. Furthermore, various types of mutations in Pro1 were detected in geographically distant *P. oryzae*, including pandemic isolates of wheat blast fungus. These results provide the first evidence that loss of female fertility may be advantageous to the life cycle of some plant pathogenic fungi.

### Significance

35 Many pathogenic and industrial fungi are thought to have abdicated sexual reproduction, but the mechanisms and biological importance have been a long-standing mystery. Discovering why such fungi lost fertility is important to understand their survival strategies. Here, we revealed the genetic basis of how the rice blast fungus lost female fertility in nature and how this affects the life cycle. This has important implications for understanding evolution of blast pathogens and for developing an effective management strategy to control blast disease before a pandemic. Our

findings also provide an additional perspective on advantages of asexual reproduction in some eukaryotes.

**Main Text:** Sexual reproduction is common in eukaryotic organisms and is considered to have evolved once in the last eukaryotic common ancestor (1, 2, 3). The process of meiosis in mating can produce genetic diversity and purge deleterious mutations in the genome of the progeny (4, 5). However, this mode of reproduction might be associated with various costs and risks (6, 7); for example, finding mating partners is both time and energy expensive, and genetic shuffling with other individuals increases the risks of sexually transmitted diseases. Theoretical analyses suggest that the advantage of sexual reproduction is often quite restrictive, and switching to asexual reproduction within a sexual species may enable asexual progeny to outcompete and displace sexual progeny (8, 9). Thus, why sex is evolutionarily advantageous remains largely unexplored (paradox of sex).

Fungi and animals evolved from a common single-celled ancestor and constitute the opisthokonts (10, 11). Each fungal group shows a wide variety of sexual development, and most known fungal species reproduce both asexually and sexually (10, 12). Although fungal sexual reproduction may be cryptic or facultative, several industrial and pathogenic fungi are considered to reproduce only asexually in their life cycles owing to partial or complete sterility (12–17). Interestingly, these asexual fungi maintain certain key components of the mating and meiosis genes, suggesting that evolutionary shifts from sexual to asexual reproduction have occurred and that asexual fungi have dominated by natural selection.

*Pyricularia oryzae* (syn. *Magnaporthe oryzae*) is a haploid filamentous ascomycete fungus and causes blast disease on a variety of cereal and grass hosts, such as rice (*Oryza sativa*), wheat (*Triticum aestivum*), barley (*Hordeum vulgare*), finger millet (*Eleusine coracana*), foxtail millet (*Setaria italica* and *S. viridis*), perennial ryegrass (*Lolium perenne*), annual ryegrass (*Lolium multiflorum*), southern cutgrass (*Leersia hexandra*), and goosegrass (*Eleusine indica*) (18). The rice blast fungus, which causes the most devastating disease of cultivated rice

worldwide, is well studied as a model plant pathogenic fungus. The pathogen is indicated to have diverged from a *S. italica*-infecting strain in the Middle Yangtze Valley of China approximately 2500–7500 years ago, during or shortly after rice domestication in East Asia (19). The infection cycle of this fungus consists of asexual reproduction. The infection starts when a three-celled asexual spore (conidium) adheres to the hydrophobic surface of a rice leaf. The germinated conidium develops a dome-shaped infection-specific structure, termed an appressorium, to invade an epidermal cell (20, 21). After invasion, filamentous invasive hyphae spread to adjacent cells and develop a visible disease lesion on the leaf surface. In humid conditions, conidiophores and conidia are produced on the lesion, and the conidia are delivered to new host plants by wind or dewdrop splashes, initiating a new cycle (20, 21). In addition to the asexual life cycle, the sexual reproduction of *P. oryzae* has been observed under laboratory conditions (22, 23). *P. oryzae* is a heterothallic fungus and carries either *MAT1-1* (*MAT1- $\alpha$* ) or *MAT1-2* (*MAT1-HMG*) idiomorphs on chromosome 7 (24, 25). Sexual reproduction occurs by the interaction between two strains with the opposite mating type, and produces a multicellular female organ, termed a perithecium, in which asci develop (22–26) (Fig. 1A). Eight four-celled ascospores (sexual spores) are produced per ascus through meiosis and mitosis (22–26) (Fig. 1A). Sexual reproduction requires at least one female-fertile strain that is capable of producing perithecia; however, female fertility has been lost in the most field isolates of the rice blast fungus (27–29). Interestingly, sexual reproduction has been lost in some ascomycete plant pathogens, but the contributing factors and biological importance have long remained unknown (30–32).

Some isolates in the region of origin of *P. oryzae* retain female fertility (27–29), and population genetic/genomic studies have provided evidence that sexual recombination events continue to occur, at least in limited areas within this region (27–29,33). Therefore, it has been hypothesized that the loss of sexual reproduction occurred during its geographic spread from the

region of origin. *P. oryzae* is an ideal biological model for studying the reason for the evolutionary shift in reproductive mode (12, 27). Although many mating-related genes have been identified in ascomycete fungi (34–37), the genes and mechanisms responsible for the loss of sexual reproduction in nature have remained unclear. In this study, we established that functional mutation of the transcriptional regulator *Pro1* causes loss of female fertility and leads to increase in the release of conidia from conidiophores. In addition, various types of mutations in *Pro1* were independently detected in several geographically distant *P. oryzae* isolates. Given that the increase in conidial detachment would be effective for geographic spread and dispersal of conidia to other host plants, we provide experimental evidence that loss of sexual reproduction may confer a fitness advantage for the life cycles in plant pathogenic fungi.

## Results

### *Generation of F<sub>4</sub> near-isogenic strains by recurrent backcrossing*

We set out to obtain female-sterile and female-fertile near-isogenic strains of *P. oryzae* employing a backcrossing strategy. First, we evaluated mating capability of rice-infecting field isolates: CH598 (*MAT1-α*) and CH524 (*MAT1-HMG*) collected from Yunnan, China (the region of origin of this pathogen), and Hoku-1 (*MAT1-α*; synonymous with Hoku1), P2 (*MAT1-HMG*; synonymous with P-2), and Kyu89-246 (*MAT1-HMG*) collected from Japan (25). When two strains are female-fertile and male-fertile, two lines of perithecia are formed, one for each female-fertile strain (Fig. 1B, C). Crosses of a female-fertile strain with a female-sterile strain develop one line of perithecia, whereas no perithecia are formed in crosses between two female-sterile strains (Fig. 1B, C). In our experiment, perithecia were developed in two lines by crossing CH598×CH524, whereas few and dotted perithecia were developed by crossing Hoku-1×CH524 (fig. S1A). One line of perithecia were formed by crossing CH598×Kyu89-246 and CH598×P2

(fig. S1A). No perithecia were formed by crossing Hoku-1×P2 and Hoku-1×Kyu89-246 (fig. S1A). Thus, CH598 and CH524 were defined as female-fertile strains, and Hoku-1, P2 and Kyu89-246 were defined as female-sterile strains (Fig. 1C). Mature asci containing viable ascospores were obtained by crossing CH598×CH524 and CH598×Kyu89-246, although viable ascospores were not frequent for CH598×Kyu89-246 (fig. S1B). Perithecia produced by Hoku-1×CH524 and CH598×P2 contained no ascospores (fig. S1B). From these results, CH598 and Kyu89-246 were subsequently used for the backcrossing analysis.

We obtained 91 F<sub>1</sub> progenies (57 *MATI-α* and 34 *MATI-HMG*) from CH598×Kyu89-246. All 57 progenies harboring *MATI-α* were backcrossed with Kyu89-246, and the six progenies produced perithecia (female fertility). However, the perithecia did not contain mature ascospores (fig. S2). In addition, by backcrossing with CH598, two out of 19 progenies harboring *MATI-HMG* formed two lines of perithecia with mature ascospores (female fertility), and the other progenies formed one line (female sterility) (fig. S2). Thus, one female-sterile progeny harboring *MATI-HMG* (F<sub>1</sub>-3) was used for subsequent backcrossing with CH598 (Fig. 1D). Each female-sterile F<sub>2</sub> (F<sub>2</sub>-9) and F<sub>3</sub> (F<sub>3</sub>-2) progeny harboring *MATI-HMG* was crossed with CH598, and in total 37 F<sub>4</sub> progenies were obtained (Fig. 1D and fig. S2). The segregation ratio of female-fertile and -sterile F<sub>4</sub> progenies was approximately 1:1, independent of the *MATI* locus (table S1), suggesting that the tested F<sub>3</sub> progeny (F<sub>3</sub>-2) carried a single gene or genomic region involved in female sterility.

### ***Identification of genomic region responsible for loss of female fertility***

To determine the gene or genomic region responsible for loss of female fertility, we conducted a comparative genomic analysis between the female-fertile and -sterile F<sub>4</sub> progenies. Four independent genomic DNA extracts from each four female-fertile and four female-sterile F<sub>4</sub>

progenies were separately pooled and sequenced using an Illumina HiSeq platform.

Theoretically, each F<sub>4</sub> progeny inherits 6.25% (1/16) of the genome derived from Kyu89-246. In addition, by mixing four genomic DNAs, an eight-fold higher resolution is expected because each additional genome of each progeny doubles the resolution. Each read obtained from female-  
5 fertile and -sterile progenies was mapped to the *P. oryzae* reference genome, and 40,080 and 40,422 variants were detected from each set of reads. By comparison, 9,066 variants were detected in the genomes of female-sterile progenies. Visualizing of the loci of variants in the reference genome showed a variant-rich region (112 substitutions within 516 kb) on chromosome 5 (Fig. 1E). This region was designated as FS1 (Female Sterility 1) and was  
10 analyzed in greater detail to identify candidate genes involved in female fertility.

Among 168 protein-coding genes located in the FS1 region, amino acid substitutions were detected in 11 genes (fig. S3). Thus, we disrupted these candidate genes in CH598 using the CRISPR/Cas9 system (38) and evaluated female fertility. The deletion mutants for MGG\_11498 (hypothetical protein) and MGG\_00779 (choline dehydrogenase) showed decrease perithecia  
15 formation when crossed with Kyu89-246 (fig. S3). The deletion mutants for MGG\_00722, MGG\_00706, and MGG\_00693, encoding hypothetical proteins, could not be obtained. Deletion of the remaining six genes, MGG\_00791, MGG\_00771, MGG\_00747, MGG\_17384, MGG\_11512, and MGG\_17398, resulted in no remarkable changes in mating ability (fig. S3). To test whether the five genes MGG\_11498, MGG\_00779, MGG\_00722, MGG\_00706,  
20 MGG\_00693 were responsible for loss of female fertility in Kyu89-246, we introduced female-sterile-type amino acid mutations into CH598 by CRISPR/Cas9-mediated base editing (39). None of these mutations affected female fertility, indicating that these genes are not involved in female sterility.

Because genes responsible for loss of female fertility were not located within the FS1 region, we conducted linkage analysis to clarify whether the FS1 and neighboring regions are associated with female sterility. A *hygromycin phosphotransferase (HPH)* gene cassette was knocked-in to each left (L), central (C), and right (R) locus of the FS1 region in CH598 using the CRISPR/Cas9 system (Fig. 2A). Each obtained transformant (CH598 FS1L-*HPH*, CH598 FS1C-*HPH*, or CH598 FS1R-*HPH*) was crossed with the female-sterile F<sub>4</sub>-5 (*MAT1-HMG*) and more than 50 ascospores were randomly collected from each cross. Most of the *HPH*-possessing progenies were female fertile, and the FS1R locus showed slightly stronger linkage than the other loci (Fig. 2A). However, several female-sterile *HPH*-possessing progenies were obtained in all crosses, suggesting that the responsible gene was located outside of this region (Fig. 2A).

In addition to the linkage analysis, we analyzed genotypes around the FS1 region in the F<sub>4</sub> progenies to examine whether the DNA sequences were consistent with the phenotype. SNPs within MGG\_00779, MGG\_00693, and MGG\_00773 genes were selected as targets for genotyping because these genes were close to the FS1L, FS1C, and FS1R loci, respectively (Fig. 2A and B). Among 37 F<sub>4</sub> progenies, 34 had the SNPs corresponding to the phenotype, but F<sub>4</sub>-15 (female fertile), F<sub>4</sub>-25 (female fertile), and F<sub>4</sub>-4 (female sterile) lacked the SNPs (Fig. 2B). These results were consistent with the linkage results, which contained *HPH*<sup>+</sup> female-sterile and *HPH*<sup>-</sup> female-fertile progenies (Fig. 2A). Thus, we analyzed SNPs located outside of the FS1 region in F<sub>4</sub>-15, -25, and -4. The SNPs located 887 kb upstream (within the putative promoter region of MGG\_17324) of FS1L (FS1Lu887) were inconsistent with their phenotypes (Fig. 2B). In contrast, the SNPs located 887 kb downstream from FS1R (within MGG\_00399 ORF) (FS1Rd887) were correlated to the phenotype (female fertility) in F<sub>4</sub>-15 and -25 (Fig. 2B). These results strongly suggested that the responsible gene was located downstream of the FS1 region. However, F<sub>4</sub>-4 (female sterility) contained the female-fertile-type SNPs at the FS1Rd887 locus



(Fig. 2B). Therefore, we speculated that F<sub>4</sub>-4 was a spontaneous mutant that lost female fertility during laboratory cultivation, similar to previously reported female-sterile-evolved strains (12; see Discussion and fig.S4).

To determine the genetic region involved in loss of female fertility, the *HPH* cassette was  
5 knocked-in at FS1Rd887 in CH598 (Fig. 2A). Crossed with the female-sterile F<sub>4</sub>-5 (*MAT1*-*HMG*), the transformant (CH598 FS1Rd887-*HPH*) showed a recombination frequency of 3.8% (Fig. 2A). This frequency was higher than that in FS1R (1.8%) and lower than that in FS1L (5.5%) and FS1C (4.3%) (Fig. 2A), indicating that the region involved in female sterility was located between FS1R and FS1Rd887, and was closer to FS1R in genetic distance. We inserted  
10 the *bialaphos resistance* (*BAR*) gene cassette at 418 kb downstream from FS1R (FS1Rd418) in the female-sterile F<sub>4</sub>-5 progeny (Fig. 2), and the transformant (F<sub>4</sub>-5 FS1Rd418-*BAR*) was crossed with CH598 FS1R-*HPH* or FS1Rd887-*HPH*. The recombination frequencies of *BAR* were lower than those of *HPH*, indicating that the female sterility gene was more strongly linked to FS1Rd418 than FS1R or FS1Rd887 (Fig. 2C). Furthermore, the two progenies in which  
15 recombination occurred between FS1R and FS1Rd418 (*HPH*<sup>-</sup>/*BAR*<sup>-</sup> or *HPH*<sup>+</sup>/*BAR*<sup>+</sup>) were female fertile, whereas five progenies with recombination between FS1Rd418 and FS1Rd887 (*HPH*<sup>-</sup>/*BAR*<sup>-</sup> or *HPH*<sup>+</sup>/*BAR*<sup>+</sup>) contained both female-fertile and female-sterile strains (Fig. 2C), indicating that the gene responsible for loss of female fertility was located between FS1Rd418 and FS1Rd887. In addition, a consistent genotype was detected across this region in F<sub>4</sub>-15 and  
20 F<sub>4</sub>-25. From these results, we re-aligned the HiSeq reads of the female-fertile F<sub>4</sub> progenies to the *de novo* assembled genome of female-sterile F<sub>4</sub> progenies and re-mapped the detected substitutions to the reference genome. The cluster of nucleotide substitutions was isolated until 877 kb downstream of FS1 (fig. S5).

***Functional mutation of putative transcriptional regulator Pro1 induced loss of female fertility in Pyricularia oryzae Kyu89-246***

Three genes (MGG\_00494, MGG\_14683, and MGG\_00428) with amino acid substitution(s) in the female-sterile progenies were located within the FS1Rd418–FS1Rd887 region in the 70-15 genome (Table 1). Phenotypic analysis of deletion mutants of these genes in CH598 revealed that MGG\_00494, which codes a putative Zn(II)<sub>2</sub>Cys<sub>6</sub> zinc cluster transcriptional factor Pro-1 (hereafter *Pro1*), is necessary for perithecium formation (Fig. 3A). Complementation with the *Pro1* sequence derived from CH598 (female fertile) restored the fertility of the  $\Delta pro1$  mutant (Fig. 3A). The amino acid sequence similarity of Pro1 derived from CH598 (*Pro1*<sup>CH598</sup>) with *Sordaria macrospora* Pro1 (SMAC\_00338) and *Neurospora crassa* Adv-1 (NCU07392) was 71.19% and 72.19%, respectively (fig. S5). Compared with *Pro1*<sup>CH598</sup>, two mutations, S16W and frameshift after G125 (8 bp deletion), which leads to protein truncation (Fig. 3B), were detected in the *Pro1* sequence of Kyu89-246 (*Pro1*<sup>Kyu89-246</sup>). To clarify whether these mutations affect Pro1 function, we generated three types of mutants in CH598: S16W (PM<sup>S16W</sup>), truncation (PM<sup>truncation</sup>), and S16W + truncation (PM<sup>Kyu89-246</sup>) (Fig. 3B). In crosses with Kyu89-246, PM<sup>S16W</sup> and the wild type formed perithecia, whereas PM<sup>truncation</sup> and PM<sup>Kyu89-246</sup> did not form perithecia (Fig. 3A). These results showed that the truncation type mutation (loss of function of Pro1) induces loss of female fertility in CH598.

To validate whether the functional Pro1 restores the female fertility in female-sterile field isolates, we introduced *Pro1* derived from CH598 (*Pro1*<sup>CH598</sup>) into F<sub>4-5</sub> and Kyu89-246. As a result, the F<sub>4-5</sub> transformant (F<sub>4-5</sub> *Pro1*<sup>CH598</sup>) showed fully restored female fertility (Fig. 3A), indicating that *Pro1* is one gene responsible for loss of female fertility. This result is consistent with the segregation ratio (1:1) of female fertility and female sterility in the F<sub>4</sub> progeny. Meanwhile, recovery of female fertility in Kyu89-246 *Pro1*<sup>CH598</sup> was not observed (Fig. 3A).

Thus, we directly modified the mutated *Pro1* in Kyu89-246 (*Pro1*<sup>Kyu89</sup>) by base editing, to replace it with CH598-type *Pro1* (PM<sup>CH598</sup>) (Fig. 3B); however, the functional *Pro1* sequence in Kyu89-246 could not restore female fertility. These results suggested that more than one gene is responsible for female sterility in the isolate Kyu89-246.

5

### ***Pro1* functioned as a transcriptional regulator and regulated mating-related genes**

Both *S. macrospora* Pro-1 and *N. crassa* Adv-1 are reported to play a role as a transcriptional regulator involved in sexual signal transduction and perithecium formation (40–42). To validate the Pro1 function in *P. oryzae*, we performed RNA sequencing (RNA-seq) analysis using the two parental strains (CH598 and Kyu89-246), three female-fertile F<sub>4</sub> progenies harboring *Pro1*<sup>CH598</sup>, and three female-sterile F<sub>4</sub> progenies carrying *Pro1*<sup>Kyu89-246</sup>. Principal component analysis revealed that the mycelial transcriptome on RY media (supernatant of rice flour broth) was clustered into three groups: 1. Female-fertile strains including CH598, 2. Female-sterile progenies, and 3. Kyu89-246 (Fig. 4A). The group of female-sterile progenies was closer to female-fertile strains than Kyu89-246; therefore, this grouping may reflect the genetic background of each strain. In addition, a two-dimensional heatmap revealed similar clustering (Fig. 4B).

As well as the  $\Delta$ *pro1* mutant of *S. macrospora* (42), the RNA-seq analysis showed that the expression of genes involved in the early stage of sexual development in *Aspergillus nidulans* (*EsdC*) (43), cell wall integrity pathway (*Pro40*) (44), hyphal fusion (*Ham-7* and *Ham-8*) (45), and reactive oxygen species signaling (*Nox1* and *Pro41*) (46, 47) were decreased in the female-sterile progenies (Fig. 4C). In addition to these genes, we identified 48 upregulated and 53 downregulated genes in the female-fertile progenies (fold change > 2 and  $p < 0.01$ ; table S2). Among the upregulated genes, 37 were annotated as hypothetical protein, and 17 were unique to

20

*P. oryzae*. Annotated functions of other genes were highly diverse and no significant GO enrichment was detected (g:SCS algorithm in g:Profiler (48),  $p < 0.05$ ). The 40 downregulated genes encoded hypothetical proteins, a half of which was unique to *P. oryzae* (table S2). These results indicated that Pro1 regulates several mating-related genes; therefore, loss-of-function of Pro1 leads to loss of female fertility in *P. oryzae*.

### ***Loss-of-function of Pro1 increases conidial release in P. oryzae***

Given that most rice-infecting field isolates of *P. oryzae* show female sterility (27–29), we hypothesized that loss of female fertility caused by functional mutation of Pro1 provides fitness advantages in the asexual infection and saprotrophic life cycles. To test this hypothesis, we assessed the vegetative growth, conidiation, appressorium formation, and penetration in the *Pro1* mutants. Compared with CH598, the  $\Delta pro1$  mutant showed a slightly decreased growth rate on the rice flour medium (Fig. 5A), whereas the rate was comparable to CH598 on the complete medium (CM; fig. S7). Conidia production by the mutant was increased on rice flour medium (Fig. 5B) but was reduced on CM (fig. S7). Consistently, in CH598  $\Delta pro1/Pro1^{Kyu89-246}$ ,  $PM^{truncation}$ , and  $PM^{Kyu89-246}$ , the phenotypes were similar to that of the  $\Delta pro1$  mutant (Fig. 5A, B). We also examined the Pro1 function in Kyu89-246.  $PM^{CH598}$  grew more rapidly than Kyu89-246 on rice flour medium (Fig. 5A) but the growth rate was comparable to Kyu89-246 on CM (fig. S7). The number of conidia produced by  $PM^{CH598}$  was comparable to that of Kyu89-246 on rice flour medium (Fig. 5B) but was reduced on CM (fig. S7). Thus, Pro1 regulation of vegetative growth and conidiation in *P. oryzae* was dependent on nutrient conditions and/or strains. The rates of germination, appressorium formation, and penetration were not significantly different between the wild-type strains and mutants (fig. S8).

Because it has been previously reported that female-sterile-evolved strains increased conidial detachment (12), we further analyzed that in the *Pro1* mutants. Regarding CH598 and its mutants, detachment was approximately 4–7 times higher in the  $\Delta pro1$ ,  $PM^{truncation}$ , and  $PM^{Kyu89-246}$  mutants than in CH598, CH598  $\Delta pro1/Pro1^{CH598}$ , and  $PM^{S16W}$  on rice flour medium (Fig. 5C). Similarly, for Kyu89-246, detachment in  $PM^{CH598}$  was six times fewer than that in the wild type and the  $\Delta pro1$  mutant (Fig. 5C). The increase in release of conidia in the *Pro1* mutants was observed on CM in both strains (fig. S7), suggesting that conidial release was not dependent on nutrient conditions and strain, which may confer an advantageous trait for propagation and/or colonization in the life cycle of *P. oryzae*.

10

#### ***Mutations in Pro1 are widely distributed in field isolates of P. oryzae***

To examine whether the mutations of *Pro1* are common in female-sterile isolates of *P. oryzae*, we first sequenced *Pro1* in the Japanese female-sterile field isolates P2 and Hoku-1. Both P2 and Hoku-1 had frameshift mutations after V605 (35 bp insertion: #2 mutation type in Fig. 6) and D317 (5 bp deletion and 43 bp insertion: #3 mutation type in Fig. 6) in the *Pro1* open reading frame. Similar to Kyu89-246, direct modification of the mutated *Pro1* did not restore female fertility in these isolates, whereas these mutations caused loss of female fertility in CH598 (fig. S8). These results indicated that P2 and Hoku-1 harbor other genes responsible for female sterility as well as Kyu89-246. We examined publicly available genome data for *P. oryzae*, including isolates from cereal and grass hosts. Various mutations in *Pro1* were detected in 137 of 329 genomic data sets. The mutations of *Pro1*, including those of Kyu89-246, P2, and Hoku-1, were classified into 29 variants, comprising amino acid substitutions, truncation, and mutation in the  $Zn(II)_2Cys_6$  DNA-binding domain (Fig. 6 and table S3). Although many mutations were classified into variant #4, the same as the  $PM^{S16W}$  mutation which retains the

15  
20

Pro1 function, approximately two-thirds (20/29) of all variants showed truncation-type mutations. Given that C-terminal truncation of Pro1 detected in P2 (variant #2) caused female sterility in CH598 (fig. S9), the other truncation-type variants will also lead to loss-of-function of Pro1. The protein structural prediction of these variants by ColabFold (49) suggested that all of the variants alter the structure or folding of Pro1 (fig. S10). Therefore, the variants with amino acid substitutions (#5–12) may also cause loss-of-function of Pro1 or decrease in activity. The mutations, except for #4, were detected in geographically distant rice-infecting isolates collected from Italy, South Korea, China (Jiangsu), Suriname, and Japan, and some of them were phylogenetically distant despite close phylogenic relationships (fig. S11). These results suggest that loss of female fertility occurred independently during range expansion. In addition to the rice-infecting isolates, truncations of Pro1 were detected in the isolates from *T. aestivum*, *L. hexandra*, *S. viridis*, and *L. multiflorum*, suggesting that loss of female fertility caused by functional mutation of Pro1 is not uncommon in *P. oryzae* (table S3). Interestingly, the truncation-type mutations were frequently detected in pandemic isolates of the wheat blast fungus from Bangladesh (50–52)(#25 and #26 mutation types in Fig. 6 and table S3). Because the pathogen was first detected in Brazil and spread subsequently to the countries, loss of female fertility may be proceeding in the wheat blast fungus as well as the rice blast fungus.

## Discussion

Complementation of the mutated *Pro1* with the functional sequence in the female-sterile F<sub>4</sub> progeny restored female fertility; however, fertility was not restored in the female-sterile field isolates Kyu89-246, P2, and Hoku-1 (fig. S9). These field isolates may contain at least one additional gene responsible for female sterility. The ratio of female-sterile and female-fertile F<sub>1</sub> progenies was approximately 7:1 (female sterile: 68, female fertile: 8) and that of F<sub>2</sub> progenies

was approximately 3:1 (female sterile: 29, female fertile: 10). Consistently, the segregation ratio in F<sub>1</sub> progenies possessing functional *ProI*<sup>CH598</sup> was approximately 3:1 (female sterile: 5, female fertile 2), and that in F<sub>2</sub> progenies was approximately 1:1 (female sterile: 9, female fertile: 10). Although the number of progenies was insufficient to determine the segregation ratio, these  
5 results suggest that Kyu89-246 harbors three genes responsible for loss of female fertility, and the F<sub>2</sub> progeny tested in this study carried two such genes.

The loss of Pro1 function in CH598 induced loss of female fertility (Fig. 3A). This phenotype was consistent with many sexual filamentous fungi, such as *S. macrospora* (40), *N. crassa* (41), *A. nidulans* (53), *Fusarium graminearum* (54), and *Cryphonectria parasitica* (55).  
10 As in *S. macrospora* (42), RNA-seq analysis showed that the expression levels of several mating-related genes (*Pro40*, *EsdC*, *Ham-7*, *Ham-8*, *Nox1*, *Pro41*, and *Pls1*) were decreased in the F<sub>4</sub> progenies harboring *ProI*<sup>Kyu89</sup>, compared with those in the progenies carrying *ProI*<sup>CH598</sup> (Fig. 4C). These reports and our findings provide that the role of Pro1 in perithecium formation is widely conserved in many sexual filamentous fungi, although the molecular mechanism of  
15 mating in *P. oryzae* remains poorly understood. In contrast to perithecium formation, the infection-related germination, appressorium formation, and penetration rates were not significantly affected by Pro1 function. These results were consistent with previous findings that the pathogenicity of a *ProI* mutant is comparable to that of the wild-type strain (56). Because both female-fertile and -sterile parental isolates retain pathogenicity to rice, it is reasonable to  
20 consider that the infection process and pathogenicity are not affected by functional mutation of Pro1.

The conidial detachment was increased by loss of Pro1 function in CH598 and Kyu89-246 (Fig. 5C), which would provide survival advantages for their spread and propagation. However, to the best of our knowledge, molecular mechanisms of conidial release in filamentous

fungi have not been elucidated. RNA-seq analysis showed that *Pro1* regulates 77 uncharacterized genes encoding a hypothetical protein (table S2), and these may include novel functions associated with female fertility and conidial detachment. Female fertility in field isolates of *P. oryzae* from South China was rapidly lost following 10–19 rounds of subculture (12).

5 Interestingly, these female-sterile strains, termed female-sterile-evolved strains, also show increased conidial release (12). Because the evolved strains were obtained by subculturing conidia, the increased ability for conidial detachment may be positively selected by the experimental procedure. Although the genes responsible in these strains have yet to be revealed, the efficient release of conidia and functional mutations of several genes involved in female  
10 fertility may have a trade-off relationship.

We also observed that loss of female fertility frequently occurred in CH598 under culture. Thus, we speculated that F<sub>4-4</sub>, in which the genotype of the FS1 region was inconsistent with the phenotype, is a female-sterile-evolved strain obtained under *in vitro* culture conditions. We confirmed whether loss of female fertility in the three female-sterile-evolved strains was caused  
15 by *Pro1* mutations, but no mutations were detected in these strains (data not shown). Principal component analysis showed that the transcription pattern of F<sub>4-4</sub> was most similar to that of female-fertile progenies, rather than that of female-sterile progenies (fig. S4). Therefore, we concluded that the loss of female fertility in F<sub>4-4</sub> was caused by the mutation of other genes. From these findings, the loss of female fertility in *P. oryzae* may occur rapidly and frequently by  
20 mutations under various conditions and selective pressures.

Diverse types of *Pro1* mutation were independently detected in geographically distant isolates derived from various hosts (Fig. 6, fig. S11 and table S3), consistent with the hypothesis that loss of female fertility occurred independently during or after the spread of this pathogen (33). Female sterility caused by *Pro1* mutations may often occur, accompanied by pathogen



dispersal. Interestingly, truncation-type mutations in *Pro1* have been frequently detected in pandemic isolates of the wheat blast fungus from Bangladesh (#25 and #26 in Fig. 6 and table S3). A clonal lineage (B71 lineage) of the wheat blast fungus has recently spread to Bangladesh following its independent introduction from South America (52). Importantly, the B71 isolate derived from Bolivia and clustered in the B71 lineage contained no *Pro1* mutations. This strongly suggests that loss of female fertility occurred after the introduction of this pathogen. In addition, genetic diversity among the isolates in the B71 lineage is reduced in comparison with South American isolates (52). This result is consistent with the contention that the pandemic lineage showed more reduced genetic diversity than the endemic lineage of the rice blast fungus (60). We speculate that the wheat blast fungus is still evolving rapidly, following the same evolutionary process as the loss of female fertility during the spread of the rice blast fungus.

Further analysis to identify and characterize additional genes responsible for female sterility, their functions, interactions, and phenotypic effects are required to better understand why and how *P. oryzae* lost female fertility during its evolution and the advantage conferred by the phenotype in nature. However, the present study opens new perspectives on the biological importance of loss of female fertility in plant pathogenic fungi. Our findings provide valuable information for management of plant disease before a pandemic.

## Materials and Methods

### Strains and culture conditions

*Pyricularia oryzae* isolates and transformants used and generated in this study were stored in our laboratory, with the mycelial plugs submerged in YEG-glycerol (5 g/L yeast extract, 20 g/L glucose, and 20% glycerol) at  $-80^{\circ}\text{C}$ . Originally, the female-fertile isolates CH598 and CH524 were collected from Yunnan, China by Dr. Li Chengyun, the female-sterile isolate

Kyu89-246 from Japan by Dr. Shinzo Koizumi, and P2 (P-2) and Hoku-1 (Hoku1) from Japan by Dr. Tohru Teraoka (25). Strains were grown on oatmeal agar plates (25 g/L oatmeal flour, 2.5 g/L sucrose, and 1.5% agar) at 25°C for general maintenance. Crosses were performed by confrontationally placing two strains to mate on rice flour medium (20 g/L rice flour, 2 g/L yeast extract, and 1.5% agar) and grown for 4 weeks at 20°C under fluorescent light. At least five technical replicates were conducted for each cross.

### **Progeny acquisition**

After 4 weeks cultivation, mature perithecia were collected and crushed on glass microscope slides to observe ascospores. Ascospores were inoculated onto 1.5% agar plates and incubated overnight at 28°C. Single germinated ascospores were picked up with a fine glass needle and tweezer under a microscope and inoculated onto oatmeal agar plates. Only an ascospore per perithecium was collected to ensure the randomized acquisition of progenies. Mating type and knocked-in markers were determined by PCR (see Table S4) for every progeny obtained.

### **Isolation of genomic DNA and HiSeq analysis**

Mycelial plugs were individually inoculated into 5 mL YEG broth (5 g/L yeast extract and 20 g/L glucose) in Petri dishes and incubated for 5 days at 28°C without shaking. The culture medium was removed from the mycelia using paper towels, and the mycelia were frozen with liquid nitrogen in 1.5-mL centrifuge tubes. The frozen mycelia were ground in a pestle, and the powder was suspended in DNA Lysis Buffer [400 mM Tris-HCl (pH 7.5), 60 mM EDTA, 150 mM NaCl, and 350 mM SDS]. After centrifugation, the supernatant was purified with chloroform, and the DNA was precipitated with 0.3 M sodium acetate and 50% isopropanol.

Pellets were dissolved in 50  $\mu$ L of 20  $\mu$ g/mL DNase-free RNase A solution and incubated at 65°C for 30 min. For HiSeq analysis, four monocultural DNA samples (25 $\mu$ L of 1  $\mu$ g/ $\mu$ L) were mixed by phenotype, and then libraries were prepared using the TruSeq DNA PCR Free High Throughput Library Prep Kit (Illumina). Paired-end reads of 100 bp were generated with an  
5 Illumina platform (library preparation and sequencing were performed by Macrogen Japan).

Sequence reads were analyzed using QIAGEN CLC Genomics Workbench. First, raw reads were filtered using “Trim Reads” tool to discard nucleotides with error probabilities above 0.05, or with more than one ambiguous base. Then, the trimmed reads were mapped to the *P.*  
*oryzae* 70-15 version 8 (MG8) reference genome using the “Map Reads to Reference” tool.

10 Reads of each phenotype were individually proceeded by following parameters: match score, mismatch cost, insertion cost, deletion cost, length fraction and similarity fraction were set at default (1, 2, 3, 3, 0.5 and 0.8, respectively). Paired distances were auto-detected, alignment was performed locally, and non-specific matches were discarded. Then variants between reads and the reference were detected by “Basic Variant Detection” after discarding reads non-specific, of  
15 broken pairs or with coverage > 1,000. These variants were then compared between the two phenotypes using “Compare Sample Variant Tracks” to retain inconsistent nucleotides as substitutions (detection frequency > 50%). Loci of the substitutions were visualized with SnapGene software (Insightful Science, available at <https://www.snapgene.com>) to explore the inherited region, *i.e.*, FS1, in this research. In addition, contigs were assembled *de novo* for each  
20 phenotype using CLC Genomics Workbench to precisely determine the genotyping markers and candidate genes. Parameters were set as follows. Word size and bubble size were automatically determined at 23 and 50, respectively, paired distances were auto-detected, and scaffolds were created. Reads were then mapped back to contigs, where default costs and fractions were set as above. Contigs were updated by locally aligned reads.

## Isolation of total RNA and RNA-Seq analysis

Total RNA isolation was performed using the Monarch<sup>®</sup> Total RNA Miniprep Kit (New England Biolabs). Mycelia were cultured in RY broth (20 g/L rice flour and 2 g/L yeast extract; 5 boiled in a microwave oven, and the supernatant was recovered by centrifugation). For the starter culture, mycelia were grown on RY agar (RY broth supplemented with 1.5% agar) for 5 days at 28°C. Three mycelial plugs per sample were cut from colony edges with a cork borer (5 mm in diameter), placed in a triangle in 2 mL RY broth in Petri dishes (40 mm in diameter) and incubated without shaking for 7 days at 20°C under fluorescent light. Mycelia, treated as the 10 DNA extraction procedure, were suspended in 1× DNA/RNA Protection Reagent (New England Biolabs), and RNA Lysis Buffer (New England Biolabs) was added to the supernatant after centrifugation. Steps hereafter were conducted in accordance with the supplier's protocol. The RNA was eluted in 100 µL nuclease-free water. For transcriptomic analysis, cDNA libraries were prepared with the TruSeq Stranded mRNA LT Sample Prep Kit (Illumina) and sequenced on an 15 Illumina platform to generate paired-end reads of 150 bp (performed by Macrogen Japan).

Reads were analyzed using CLC Genomics Workbench. Briefly, raw reads were filtered using “Trim Reads”. Then, the reads were mapped to the MG8 reference genome using “RNA-Seq Analysis” tool, and the “Convert to Tracks” algorithm was used to extract gene track and calculate gene expression levels (RPKM values). Three progenies for each phenotype were 20 treated as biological replicates. Principal component analysis and heat map creation were performed using the “PCA for RNA-Seq” and “Create Heat Map for RNA-Seq” tools, respectively. A heat map with complete cluster linkage was generated based on Euclidean distance without filtering (taking all transcripts into account).

## Transformation of *P. oryzae*

CRISPR/Cas9-mediated gene disruption, complementation, introduction of point mutations, and marker knock-in were performed as described previously (38, 39). pMK-bar was constructed by replacing the *HPH* cassette in pMK-dGFP (38, 39) with the *BAR* cassette. pMK-dGFP and pMK-bar were used as the backbone vectors. Pairs of flanking regions or a single genomic region with point mutations were cloned by PCR (the primers are listed in table S4), digested by appropriate restriction enzymes, and inserted into pMK-dGFP or pMK-bar. Target sites of CRISPR/Cas9 were designed and inserted as performed in previous studies (38, 39). Transformants were verified by PCR and Southern blot analysis. At least double mutants were obtained from independent transformation procedures and tested for consistence of the phenotype.

## Asexual phenotypic analyses

Vegetative growth and asexual sporulation were performed on rice flour medium and CM (61). Mycelia were inoculated from the edges of 6-day-old starter cultures with bamboo sticks. After 6 days of incubation at 28°C, vegetative growth was measured. For conidial induction, aerial hyphae of 7-day-old cultures were brushed away, and plates were placed under a black light (FL15BLB, Toshiba) for 3 days at 25°C. Conidia were collected from the plates by pouring 5 mL distilled water (D.W.) and scrubbing the surface. The collected spores were precipitated by centrifugation (10,000 ×g, 5 min), resuspended in 500 μL D.W. and counted by a Thoma hemocytometer. Appressorium formation was induced by placing 20 μL of conidial suspensions (5 × 10<sup>4</sup>/mL) onto borosilicate 18 mm × 18 mm glass coverslips (Matsunami) followed by incubation under fluorescent light at 25°C for 6 hours. Invasive capacities were tested on onion scales boiled in a microwave oven (500 W and 30 sec). Rates of appressoria evading into onion

cells were calculated 24 hours post-inoculation of the conidial suspensions. Conidial detachment assay was measured as previously (12), with slight modifications. Conidia-induced plates were stamped on 1.5% agar plates, and the conidia were recovered with 2 mL of D.W. Centrifuged conidia were resuspended in 20  $\mu$ L D.W. and counted. All experiments except conidial detachment were performed in triplicate. The conidial detachment assay was repeated ten times.

### Analyzing deposited genome assemblies

Genome data were downloaded from NCBI Genome (<https://www.ncbi.nlm.nih.gov/data-hub/genome/?taxon=318829>), as well as DDBJ Sequenced Read Archive (<https://ddbj.nig.ac.jp/search>) under the accession numbers DRR059884–DRR059895. Fastq reads downloaded from DDBJ were assembled as HiSeq analysis. Local BLAST searches for *Pro1* ORF were carried out by CLC Genomics Workbench using the BLAST database generated from all the assemblies. Hits were exported in fasta and re-aligned to the query by SnapGene. Aligned sequences were individually assessed to find substitutions.

### Protein structure prediction

The 3D structures of *Pro1* variants were predicted using ColabFold (49) to determine whether each *Pro1* variant retained its function. The program is publicly available on Google Colab (<https://colab.research.google.com/github/sokrypton/ColabFold/blob/main/AlphaFold2.ipynb>), and is based on MMseqs2 (62). The monomer structures were predicted based on information from UniProt Reference Clusters and environmental databases, without PDB information as protein templates. The Amber programme (63) was not used. For each variant, the predicted rank\_1 structure was compared with that of *Pro1*<sup>CH598</sup> (variant #0) using PyMOL

(<https://pymol.org/2/>). For variants whose Zn(II)<sub>2</sub>Cys<sub>6</sub> DNA-binding domain was more than partially conserved, the domain was aligned with that of the variant #0 (cycles: 5 and cutoff: 2.0). For the others, the alignment was performed globally so that the maximum likelihood was achieved between all regions of the protein.

5

### Construction of phylogenomic and phylogenetic trees

Phylogenomic trees were constructed using IQ-TREE (64) with 1,000 replicates of ultrafast bootstrap (65). For the phylogenomic tree, genomic assemblies with *Pro1* variants were analyzed using BUSCO (66) to detect and export BUSCO genes. Single-copy BUSCO genes commonly detected in all assemblies were collected, and multiple alignments were performed using Clustal Omega (67). These alignments were merged with the isolates, and a supermatrix was used for tree construction. For the *Pro1* phylogenetic tree, multiple alignments were performed using the nucleotide sequence of *Pro1* variants (without an intron).

10

15

**Acknowledgments:** We acknowledge Professor Elisabeth Fournier and Professor Didier Tharreau, Montpellier University, for helpful discussions and advice. We thank Robert McKenzie, PhD, from Edanz (<https://jp.edanz.com/ac>), for editing a draft of this manuscript.

### Data, Materials, and Software Availability

20

*Pyricularia oryzae* gene data are available in GenBank under the following accession numbers: *Pro1*, MGG\_00494; *Mak1*, MGG\_04943; *Mak2*, MGG\_09565; *Mek1*, MGG\_06482; *Pro40*, MGG\_01636; *Nox1*, MGG\_00750; *Nox2*, MGG\_06559; *Pro41*, MGG\_09956; *Pls1*, MGG\_12594; *Ham-5*, MGG\_06673; *Ham-7*, MGG\_10588; *Ham-8*, MGG\_01593; *Ham-9*, MGG\_00492; *EsdC*, MGG\_12316.

## References

1. D. Speijer, J. Lukeš, M. Eliáš, Sex is a ubiquitous, ancient, and inherent attribute of eukaryotic life. *Proc. Natl. Acad. Sci. U.S.A.* **112**, 8827–8834 (2015).
2. U. Goodenough, J. Heitman, Origins of eukaryotic sexual reproduction. *Cold Spring Harb. Perspect. Biol.* **6**, a016154 (2014).
3. J. Heitman, Evolution of sexual reproduction: a view from the fungal kingdom supports an evolutionary epoch with sex before sexes. *Fungal Biology Reviews* **29**, 108–117 (2015).
4. C. Zeyl, G. Bell, The advantage of sex in evolving yeast populations. *Nature* **388**, 465–468 (1997).
5. M. Goddard, H. Godfray, A. Burt, Sex increases the efficacy of natural selection in experimental yeast populations. *Nature* **434**, 636–640 (2005).
6. M. W. Feldman, S. P. Otto, F. B. Christiansen, Population genetic perspectives on the evolution of recombination. *Annu. Rev. Genet.* **30**, 261–295 (1996).
7. J. M. Smith, The evolution of sex. (Cambridge University Press, 1978).
8. J. Lehtonen, M. D. Jennions, H. Kokko, The many costs of sex. *Trends Ecol. Evol.* **27**, 172–178 (2012).
9. S. P. Otto, T. Lenormand, Resolving the paradox of sex and recombination. *Nat. Rev. Genet.* **3**, 252–261 (2002).
10. S. C. Lee, M. Ni, W. Li, C. Shertz, J. Heitman, The evolution of sex: a perspective from the fungal kingdom. *Microbiol. Mol. Biol. Rev.* **74**, 298–340 (2010).
11. B. F. Lang, C. O'Kelly, T. Nerad, M. W. Gray, G. Burger, The closest unicellular relatives of animals. *Curr. Biol.* **12**, 1773–1778 (2002).
12. D. Saleh, J. Milazzo, H. Adreit, D. Tharreau, E. Fournier, Asexual reproduction induces a rapid and permanent loss of sexual reproduction capacity in the rice fungal



- pathogen *Magnaporthe oryzae*: results of in vitro experimental evolution assay. *BMC Evol. Biol.* **12**, 42 (2012).
13. M. López-Villavicencio *et al.*, Sex in *Penicillium*: combined phylogenetic and experimental approaches. *Fungal Genet. Biol.* **47**, 693–706 (2010).
- 5 14. J. E. Ironside, Multiple losses of sex within a single genus of Microsporidia. *BMC Evol. Biol.* **7**, 48 (2007).
15. D. M. Geiser, W. E. Timberlake, M. L. Arnold, Loss of meiosis in *Aspergillus*. *Mol. Biol. Evol.* **13**, 809–817 (1996).
16. G. Butler *et al.*, Evolution of pathogenicity and sexual reproduction in eight *Candida*  
10 genomes. *Nature* **459**, 657–662 (2009).
17. G. Butler, Fungal sex and pathogenesis. *Clin. Microbiol. Rev.* **23**, 140–159 (2010).
18. H. Kato *et al.*, Pathogenicity, mating ability and DNA restriction fragment length polymorphisms of *Pyricularia* populations isolated from Gramineae, Bambusideae and Zingiberaceae plants. *Jour. Gen. Plant Pathol.* **66**, 30–47 (2000).
- 15 19. B. C. Couch *et al.*, Origins of host-specific populations of the blast pathogen *Magnaporthe oryzae* in crop domestication with subsequent expansion of pandemic clones on rice and weeds of rice. *Genetics* **170**, 613–630 (2005).
20. R. A. Wilson, N. J. Talbot, Under pressure: investigating the biology of plant infection by *Magnaporthe oryzae*. *Nat. Rev. Microbiol.* **7**, 185–195 (2009).
- 20 21. R. A. Wilson, *Magnaporthe oryzae*. *Trends Microbiol.* **29**, 663–664 (2021).
22. T. T. Hebert, The perfect stage of *Pyricularia grisea*. *Phytopathol.* **61**, 83–87 (1971).
23. H. Kato, T. Yamaguchi, The perfect state of *Pyricularia oryzae* Cav. from rice plants in culture. *Annu. Phytopathol. Soc. Japan* **48**, 607–612 (1982).

24. S. Kang, F. G. Chumley, B. Valent, Isolation of the mating-type genes of the  
phytopathogenic fungus *Magnaporthe grisea* using genomic subtraction. *Genetics* **138**, 289–  
296 (1994).
25. M. Kanamori *et al.*, Novel mating type-dependent transcripts at the mating type locus in  
5 *Magnaporthe oryzae*. *Gene* **403**, 6–17 (2007).
26. R. A. Dean *et al.*, The genome sequence of the rice blast fungus *Magnaporthe grisea*. *Nature*  
**434**, 980–986 (2005).
27. D. Saleh *et al.*, Sex at the origin: an Asian population of the rice blast fungus *Magnaporthe*  
*oryzae* reproduces sexually. *Mol. Ecol.* **21**, 1330–1344 (2012).
- 10 28. R. S. Zeigler, Recombination in *Magnaporthe grisea*. *Annu. Rev. Phytopathol.* **36**, 249–275  
(1998).
29. J. Kumar, R. J. Nelson, R. S. Zeigler, Population structure and dynamics of *Magnaporthe*  
*grisea* in the Indian Himalayas. *Genetics* **152**, 971–984 (1999).
30. L. S. Bautista-Jalón *et al.*, Genetic Differentiation of *Verticillium dahliae* Populations  
15 Recovered from Symptomatic and Asymptomatic Hosts. *Phytopathol.* **111**, 149–159 (2021).
31. C. B. Michielse, M. Rep, Pathogen profile update: *Fusarium oxysporum*, *Mol. Plant Pathol.*  
**10**, 311–324 (2009).
32. T. B. Adhikari, N. Muzhinji, D. Halterman, F. J. Louws, Genetic diversity and population  
structure of *Alternaria* species from tomato and potato in North Carolina and Wisconsin. *Sci.*  
20 *Rep.* **11**, 17024 (2021).
33. M. Thierry *et al.*, Maintenance of divergent lineages of the Rice Blast Fungus *Pyricularia*  
*oryzae* through niche separation, loss of sex and post-mating genetic incompatibilities. *PLOS*  
*Pathog.* **18**, e1010944 (2022).
34. L. Merlini, O. Dudin, S. G. Martin, Mate and fuse: how yeast cells do it. *Open Biol.* **3**,

3130008 (2013).

35. N. B. Raju, Genetic control of the sexual cycle in *Neurospora*. *Mycol. Res.* **96**, 241–262 (1992).

36. I. Teichert, S. Pöggeler, M. Nowrousian, *Sordaria macrospora*: 25 years as a model  
5 organism for studying the molecular mechanisms of fruiting body development. *Appl. Microbiol. Biotechnol.* **104**, 3691–3704 (2020).

37. R. J. Bennett, B. G. Turgeon, Fungal Sex: The *Ascomycota*. *Microbiol. Spectr.* **4**, FUNK-0005-2016 (2016).

38. T. Arazoe *et al.*, Tailor-made CRISPR/Cas system for highly efficient targeted gene  
10 replacement in the rice blast fungus. *Biotechnol. Bioeng.* **112**, 2543–2549 (2015).

39. T. Yamato *et al.*, Single crossover-mediated targeted nucleotide substitution and knock-in strategies with CRISPR/Cas9 system in the rice blast fungus. *Sci. Rep.* **15**, 7427 (2019).

40. S. Masloff, S. Pöggeler, U. Kück, The *pro1*<sup>+</sup> gene from *Sordaria macrospora* encodes a C<sub>6</sub> zinc finger transcription factor required for fruiting body development. *Genetics* **152**, 191–  
15 199 (1999).

41. H. V. Colot *et al.*, A high-throughput gene knockout procedure for *Neurospora* reveals functions for multiple transcription factors. *Proc. Natl. Acad. Sci. U.S.A.* **103**, 10352–10357 (2006).

42. E. K. Steffens, K. Becker, S. Krevet, I. Teichert, U. Kück, Transcription factor PRO1 targets  
20 genes encoding conserved components of fungal developmental signaling pathways. *Mol. Microbiol.* **102**, 792–809 (2016).

43. K. H. Han *et al.*, The *Aspergillus nidulans esdC* (early sexual development) gene is necessary for sexual development and is controlled by *veA* and a heterotrimeric G protein. *Fungal Genet. Biol.* **45**, 310–318 (2008).

44. I. Engh *et al.*, The WW domain protein PRO40 is required for fungal fertility and associates with Woronin bodies. *Eukaryot. Cell* **6**, 831–843 (2007).
45. C. Fu *et al.*, Identification and characterization of genes Required for cell-to-cell fusion in *Neurospora crassa*. *Eukaryot. Cell* **10**, 1100–1009 (2011).
- 5 46. D. E. Dirschnabel *et al.*, New insights into the roles of NADPH oxidases in sexual development and ascospore germination in *Sordaria macrospora*. *Genetics* **196**, 729–744 (2014).
47. M. Nowrousian *et al.*, The novel ER membrane protein PRO41 is essential for sexual development in the filamentous fungus *Sordaria macrospora*. *Mol. Microbiol.* **64**, 923–937  
10 (2007).
48. U. Raudvere *et al.*, g:Profiler: a web server for functional enrichment analysis and conversions of gene lists (2019 update). *Nucleic Acids Res.* **47**, W191–W198 (2019).
49. M. Mirdita *et al.*, ColabFold: making protein folding accessible to all. *Nat. Methods* **19**, 679–682 (2022).
- 15 50. Y. Inoue *et al.*, Evolution of the wheat blast fungus through functional losses in a host specificity determinant. *Science* **7**, 80–83 (2017).
51. M. T. Islam *et al.*, Emergence of wheat blast in Bangladesh was caused by a south American lineage of *Magnaporthe oryzae*. *BMC Biol.* **14**, 84 (2016).
52. S. M. Latorre *et al.*, A pandemic clonal lineage of the wheat blast fungus. bioRxiv [Preprint]  
20 (2022). <https://doi.org/10.1101/2022.06.06.494979> (accessed 25 October 2022)
53. K. Vienken, R. Fischer, The Zn(II)<sub>2</sub>Cys<sub>6</sub> putative transcription factor NosA controls fruiting body formation in *Aspergillus nidulans*. *Mol. Microbiol.* **61**, 544–554 (2006).
54. H. Son *et al.*, A phenome-based functional analysis of transcription factors in the cereal head blight fungus, *Fusarium graminearum*. *PLoS Pathog.* **7**, e1002310 (2011).

55. Q. Sun, G. H. Choi, D. L. Nuss, Hypovirus-responsive transcription factor gene *pro1* of the chestnut blight fungus *Cryphonectria parasitica* is required for female fertility, asexual spore development, and stable maintenance of hypovirus infection. *Eukaryot. Cell* **8**, 262–270 (2009).
- 5 56. J. Lu, H. Cao, L. Zhang, P. Huang, F. Lin, Systematic analysis of Zn<sub>2</sub>Cys<sub>6</sub> transcription factors required for development and pathogenicity by high-throughput gene knockout in the rice blast fungus. *PLoS Pathog.* **9**, e1004432 (2014).
57. D. Rigling, S. Prospero, *Cryphonectria parasitica*, the causal agent of chestnut blight: invasion history, population biology and disease control. *Mol. Plant Pathol.* **19**, 7–20 (2018).
- 10 58. C. Allemann, P. Hoegger, U. Heiniger, D. Rigling, Genetic variation of *Cryphonectria* hypoviruses (CHV1) in Europe, assessed using restriction fragment length polymorphism (RFLP) markers. *Mol. Ecol.* **8**, 843–854 (1999).
59. S. Urayama *et al.*, A dsRNA mycovirus, *Magnaporthe oryzae* chrysovirus 1-B, suppresses vegetative growth and development of the rice blast fungus. *Virology* **5**, 265–273 (2014).
- 15 60. P. Gladieux *et al.*, Coexistence of multiple endemic and pandemic lineages of the rice blast pathogen. *mBio* **9**, e01806-17 (2018).
61. N. J. Talbot, D. J. Ebbole, J. E. Hamer. Identification and characterization of MPG1, a gene involved in pathogenicity from the rice blast fungus *Magnaporthe grisea*. *The Plant Cell* **5**, 1575–1590 (1993).
- 20 62. M. Steinegger, J. Söding. MMseqs2 enables sensitive protein sequence searching for the analysis of massive data sets. *Nat. Biotechnol.* **35**, 1026–1028 (2017).
63. D. A. Case, *et al.*, The Amber biomolecular simulation programs. *J. Computat. Chem.* **26**, 1668–1688 (2005).

64. L. -T. Nguyen, H. A. Schmidt, A. von Haeseler, B. Q. Minh, IQ-TREE: A fast and effective stochastic algorithm for estimating maximum likelihood phylogenies. *Mol. Biol. Evol.* **32**, 268–274 (2015).
65. D. T. Hoang, O. Chernomor, A. von Haeseler, B. Q. Minh, L. S. Vinh, UFBoot2: Improving the ultrafast bootstrap approximation. *Mol. Biol. Evol.* **35**, 518–522 (2018).
66. R. M. Waterhouse *et al.*, BUSCO Applications from Quality Assessments to Gene Prediction and Phylogenomics. *Mol. Biol. Evol.* **35**, 543–548 (2018).
67. F. Sievers *et al.*, Fast, scalable generation of high-quality protein multiple sequence alignments using Clustal Omega. *Mol. Sys. Biol.* **7**, 539 (2011).

10

**Funding:** This work was supported in part by a Japan Society for the Promotion of Science (JSPS) Grant-in-Aid for Young Scientists (A) (17H05021) and JSPS Grant-in-Aid for Scientific Research (C) (22K05658).

**Author contributions:** Designed research: TARA, TKA; Performed research: MU, TKO, AF, KK, TARA; Contributed new reagents/analytic tools: KK, TARI, TT; Analyzed data: MU, TKO, AF, TARI, TT, TARA, TKA; Wrote the paper: MU, TARA, TKA.

15

**Competing interests:** The authors declare no competing interests.

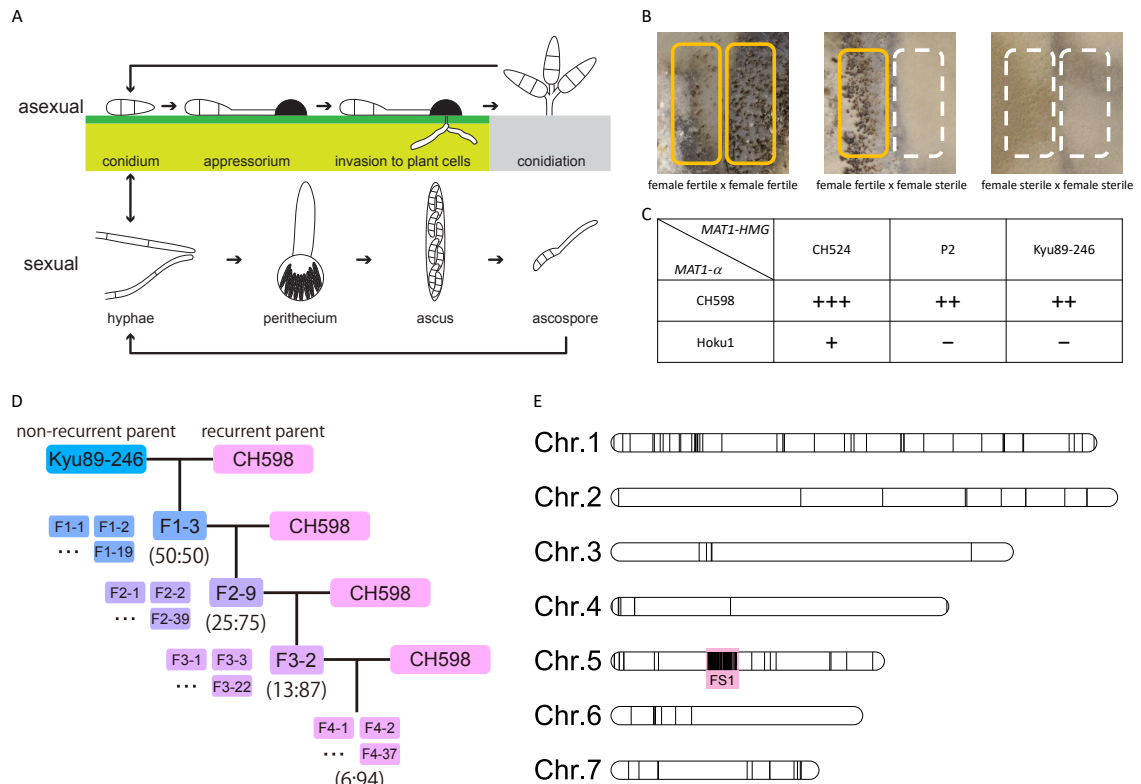

**Fig. 1. Perithecium formation, assessment of inheritance of female sterility, and nucleotide substitutions unique to female-sterile isolates in *Pyricularia oryzae*.**

(A) The life cycle of *P. oryzae*. (B) Perithecium formation in *P. oryzae*. Perithecia develop on the border of two strains, in two lines when both strains are female fertile (left) or in one line when one strain is female fertile and the other is female sterile (middle). No perithecia develop between two female-sterile strains (right). (C) Perithecia development in crosses between field isolates harboring *MAT1-HMG*. +++, >100 perithecia per plate; ++, >10 perithecia per plate; +, >0 perithecia per plate; -, no perithecia. (D) Schematic diagram of the recurrent backcrossing strategy between the field isolates Kyu89-246 and CH598. One female-sterile progeny of each generation harboring *MAT1-HMG* was crossed with CH598. Parentheses represent the theoretical percentage of inherited genomic content (Kyu89-246:CH598). (E) Nucleotide substitutions between female-fertile and -sterile progenies. Black bars in each chromosome

represent loci with unique nucleotide substitutions in the genome of female-sterile progenies.

The substitutions are concentrated in a region on chromosome 5, termed the Female Sterility 1 (FS1) region (red square).

**A**

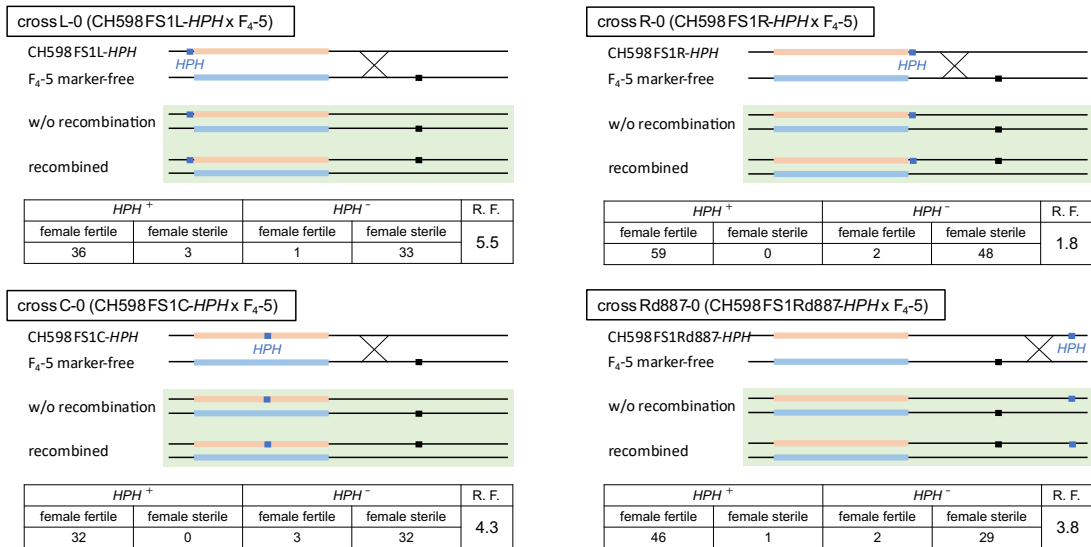

**B**

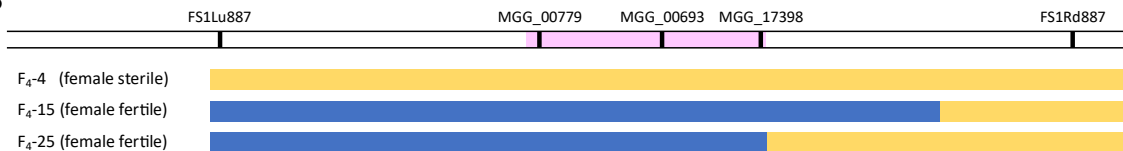

**C**

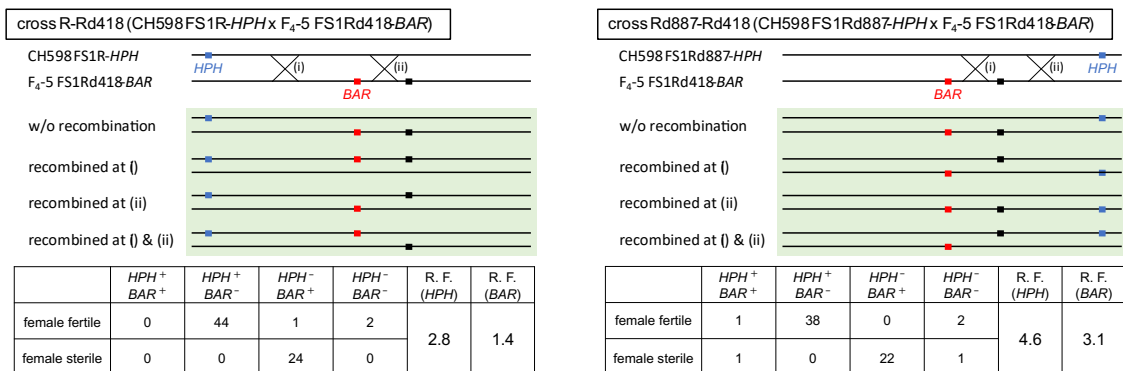



**Fig. 2. Linkage and genotyping analyses.** (A) Linkage analysis between the integrated *hygromycin phosphotransferase (HPH)* genes and female sterility. The marker-integrated CH598 transformants were crossed with marker-free F<sub>4</sub>-5. In each cross, genetic maps of the parental genomes are presented at the top, and those of possible recombinant genomes of progenies are presented in the green box. Light red and light blue bars indicate each FS1 region of CH598 and Kyu89-246 (F<sub>4</sub>-5), respectively. Black and blue boxes represent the loci of putative female sterility gene and *HPH* gene, respectively. *HPH*<sup>+</sup>, hygromycin resistance; *HPH*<sup>-</sup>, hygromycin sensitive; R.F., recombination frequency (%) between *HPH* and the female sterility. (B) Determined genotypes and phenotypes of F<sub>4</sub> progenies. Schematic representation of the loci of each target sequence for genotyping is presented at the top. Bars shaded with pink, yellow, and blue represent the FS1 region, female-fertile genotype, and female-sterile genotype, respectively. (C) Linkage analysis between integrated *BAR* genes and the female sterility. Light red and light blue bars indicate each FS1 region from CH598 and Kyu89-246, respectively. Black, blue, and red boxes represent the loci of putative female sterility gene, *HPH* gene, and *BAR* gene, respectively. *HPH*<sup>+</sup>, hygromycin resistance; *HPH*<sup>-</sup>, hygromycin sensitive; *BAR*<sup>+</sup>, bialaphos resistance; *BAR*<sup>-</sup>, bialaphos sensitive; R.F. (*HPH*), recombination frequency (%) between *HPH* and the female sterility; R.F. (*BAR*), recombination frequency (%) between *BAR* and the female sterility.

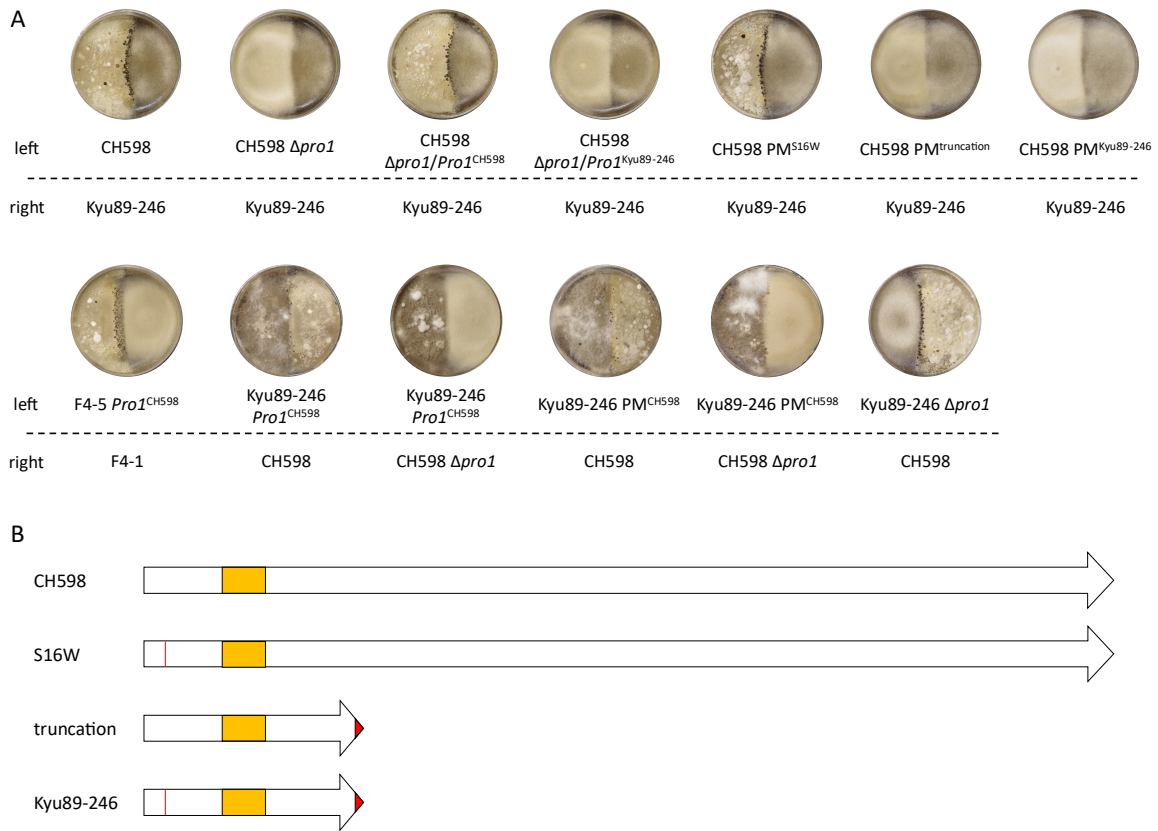

**Fig. 3. Mating capabilities of *Pro1*-deficient mutants. (A)** Female fertility for CH598, F4-5, Kyu89-246, and their transformants. **(B)** Schematic diagram of *Pro1* mutations in the parental isolates (CH598 and Kyu89-246) and transformants ( $PM^{S16W}$  and  $PM^{truncation}$ ). Regions colored red represent the substituted amino acid sequence.  $PM^{S16W}$  possesses the S16W mutation.  $PM^{truncation}$  possesses the truncation type mutation (frameshift after G125).  $PM^{Kyu89-246}$  has both S16W and truncation type mutations. Orange boxes indicate  $Zn(II)_2Cys_6$  DNA-binding domain.

5

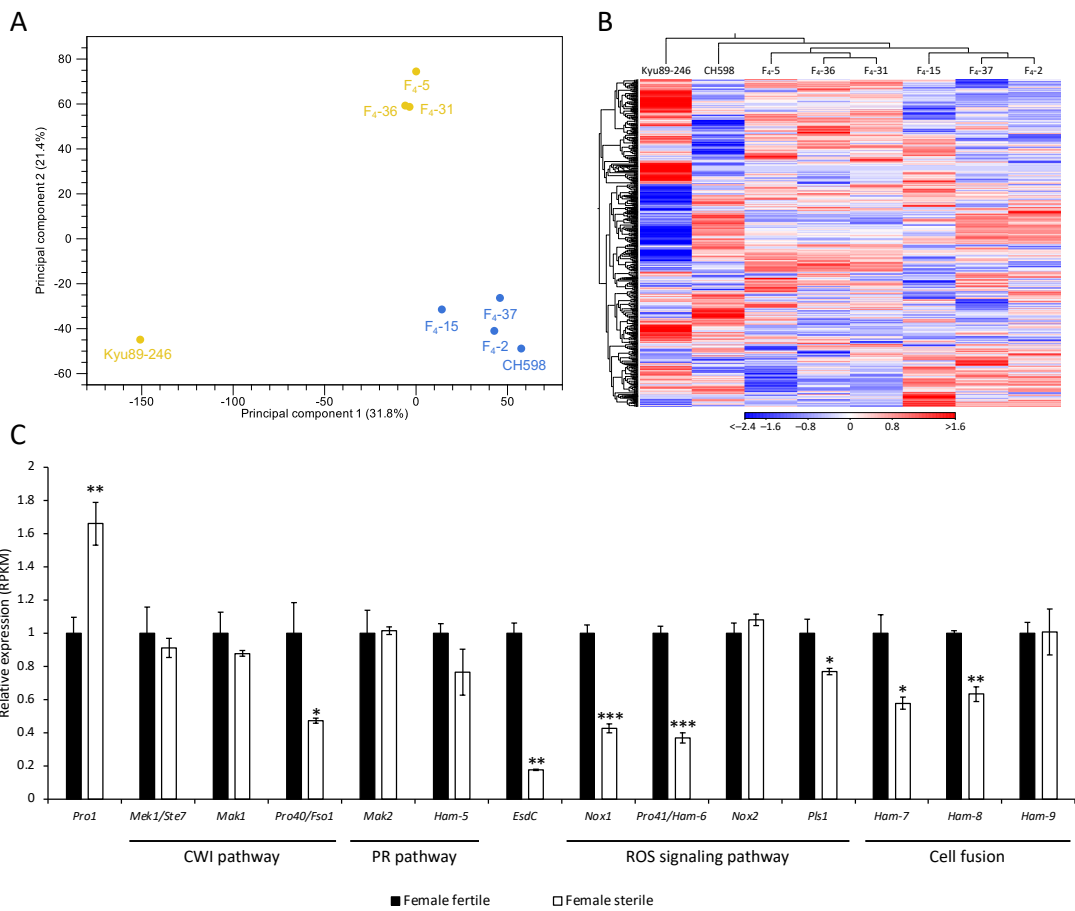

\*, \*\*, \*\*\*:  $p < 0.05, 0.01, 0.001$ , respectively

**Fig. 4. Transcriptomic analysis of F<sub>4</sub> progenies.** (A) Principal component analysis of RNA-seq

based expression. The expression profiles of female-fertile progenies and CH598 (possessing

5 functional Pro1) are colored with blue and of female-sterile progenies and Kyu-89-246 (with

non-functional Pro1) are colored with yellow. (B) Expression patterns are shown in two-

dimensional heatmap with Euclidean distance. Higher expression values are displayed red, and

lower, blue. The female-fertile and female-sterile progenies were grouped separately. (C)

Expression levels of some genes involved in cell wall integrity (CWI) pathway, pheromone

10 response (PR) pathway, reactive oxygen species (ROS) signaling pathway, and cell fusion. Black

and white bars indicate the expression levels of female-fertile and female-sterile progenies, respectively. Expression levels of each gene were calculated by dividing RPKM values in each strain by the average value of female-fertile strains. Bars and error bars indicate mean  $\pm$  SEM. \* $p$  < 0.05, \*\* $p$  < 0.01, \*\*\* $p$  < 0.001 (Welch's  $t$ -test).

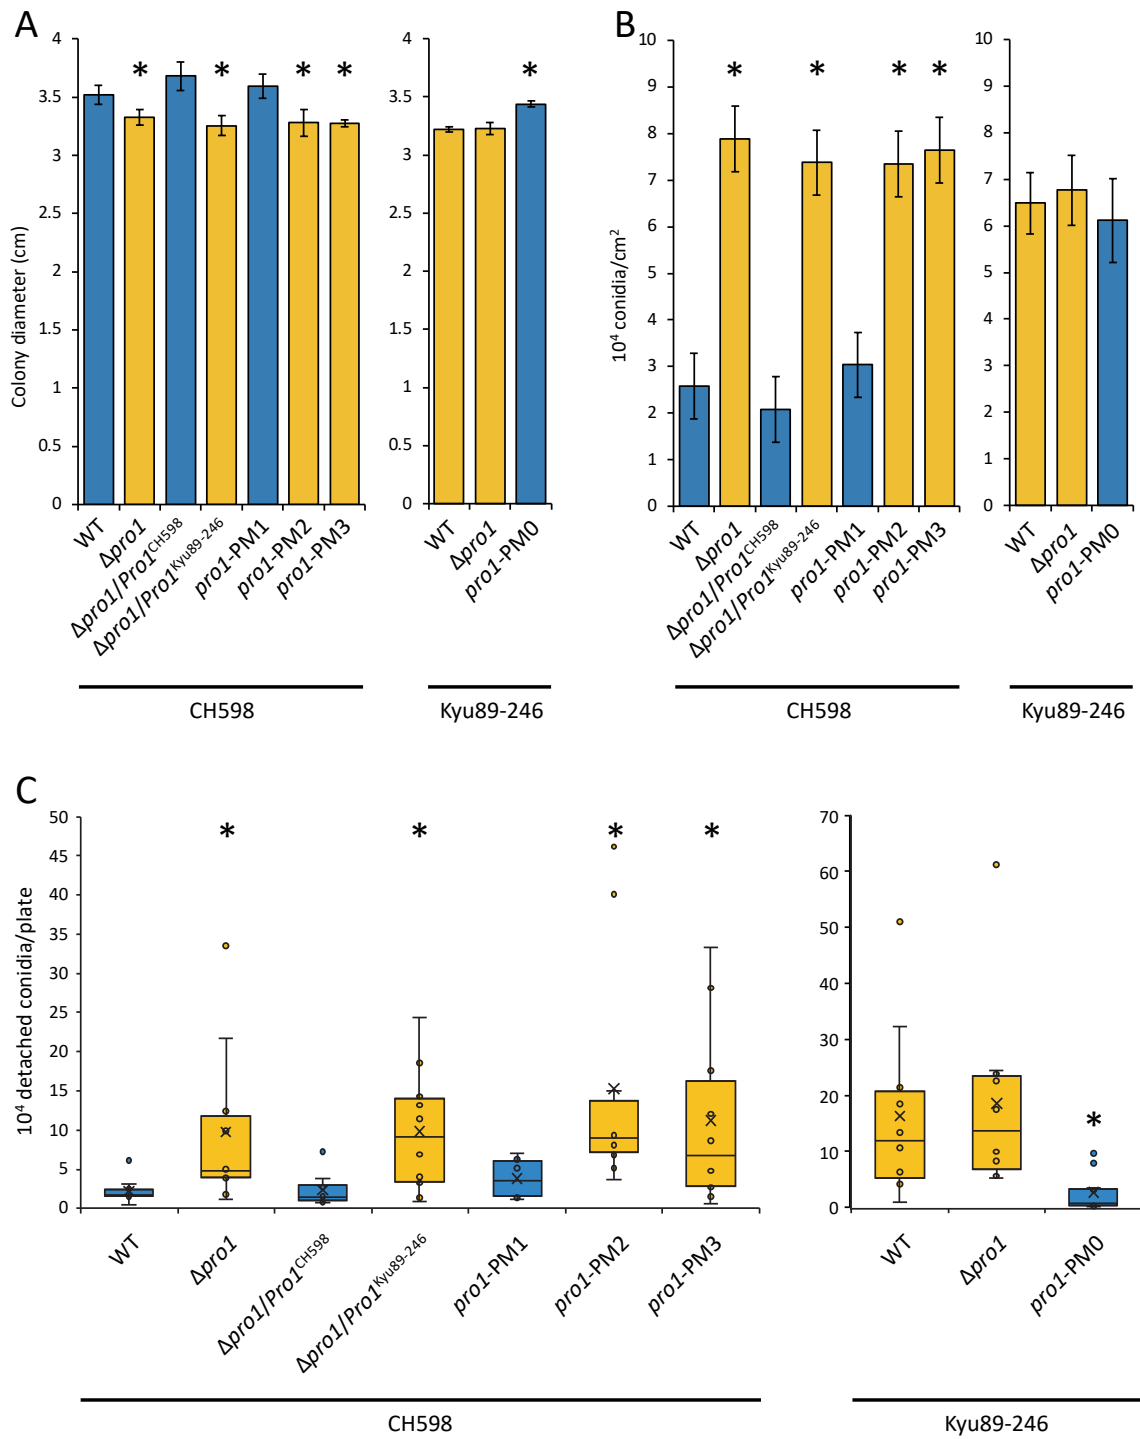

**Fig. 5. Asexual phenotypes affected by Pro1 function.** (A) Colony diameter of 6-day-old cultures in the CH598 (left) and Kyu89-246 (right) genetic backgrounds on rice flour medium.

Blue bars indicate strains possessing functional Pro1. Yellow bars indicate strains possessing dysfunctional Pro1. Diameters were measured in triplicate and repeated three times. Bars and error bars indicate mean  $\pm$  SEM. (B) Number of conidia produced in the CH598 (left) and Kyu89-246 (right) genetic backgrounds on rice flour medium. Blue bars indicate strains possessing functional Pro1. Yellow bars indicate strains possessing dysfunctional Pro1. The experiment was repeated three times. Bars and error bars indicate mean  $\pm$  SEM. (C) Box plots representing the number of conidia released per plate of rice flour medium in the CH598 (left) and Kyu89-246 (right) genetic backgrounds. The experiment was repeated ten times. Crosses indicate the mean, and the line within the box indicates the median. Blue boxes indicate strains possessing functional Pro1. Yellow boxes indicate strains possessing dysfunctional Pro1. \*  $p < 0.05$  (Welch's  $t$ -test, compared with the corresponding wild type).

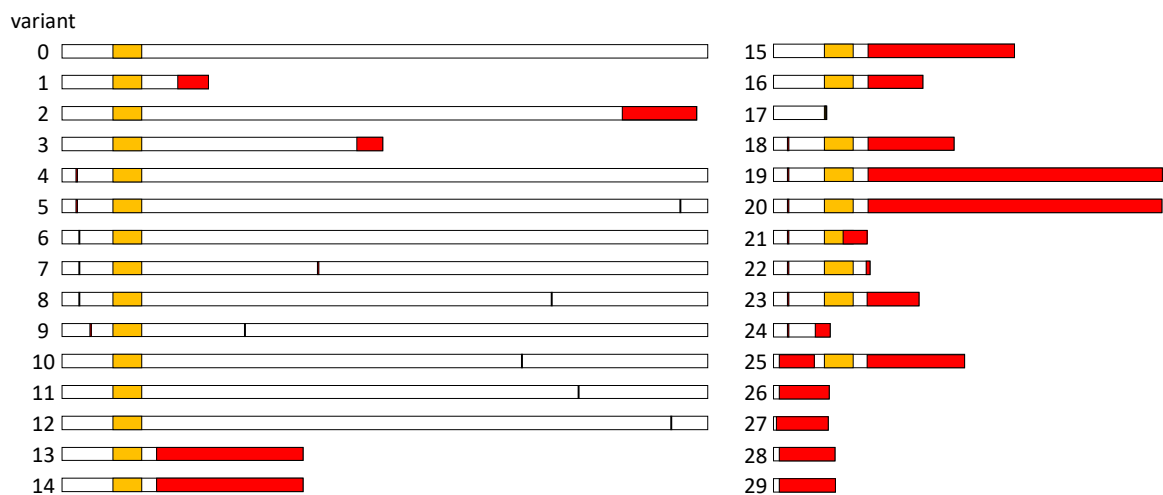

**Fig. 6. Pro1-variants detected in various assemblies deposited in NCBI and DDBJ.**

Mutations are shown in red. Orange boxes indicate Zn(II)<sub>2</sub>Cys<sub>6</sub> DNA-binding domain. Pro1-variants #0, #1, #2, and #3 were detected in CH598, Kyu89-246, P2, and Hoku-1, respectively. The majority of Pro1-variants was variant #4, which possesses the S16W (PM<sup>S16W</sup>) mutation.

Among the other Pro1-variants, 17 (#13-29) possessed truncation type mutations, and seven (#17, 21, 24, 26-29) possessed mutations which lead to loss of the Zn(II)<sub>2</sub>Cys<sub>6</sub> DNA-binding domain.

**Table 1. Candidate genes between the FS1Ed418 and FS1Ed887 regions**

| Locus     | Protein                                                  | Distance from FS1D<br>(kb downstream) | Amino acid substitutions       |
|-----------|----------------------------------------------------------|---------------------------------------|--------------------------------|
| MGG_00494 | transcriptional regulatory protein Pro-1                 | 719                                   | S16W and frameshift after G125 |
| MGG_14683 | hypothetical protein                                     | 786                                   | P494A                          |
| MGG_00428 | conidial yellow pigment biosynthesis polyketide synthase | 806                                   | V681L and T866A                |
